# Supplementary material for: A network medicine approach to investigation and population-based validation of disease manifestations and drug repurposing for COVID-19
Source: PubMed Central journal article supplement (PMC7728249; doi:10.1371/journal.pbio.3000970), 2020-11-06
Supplement: pbio.3000970.s012.pdf [file pbio.3000970.s012.pdf]

# S1 Fig

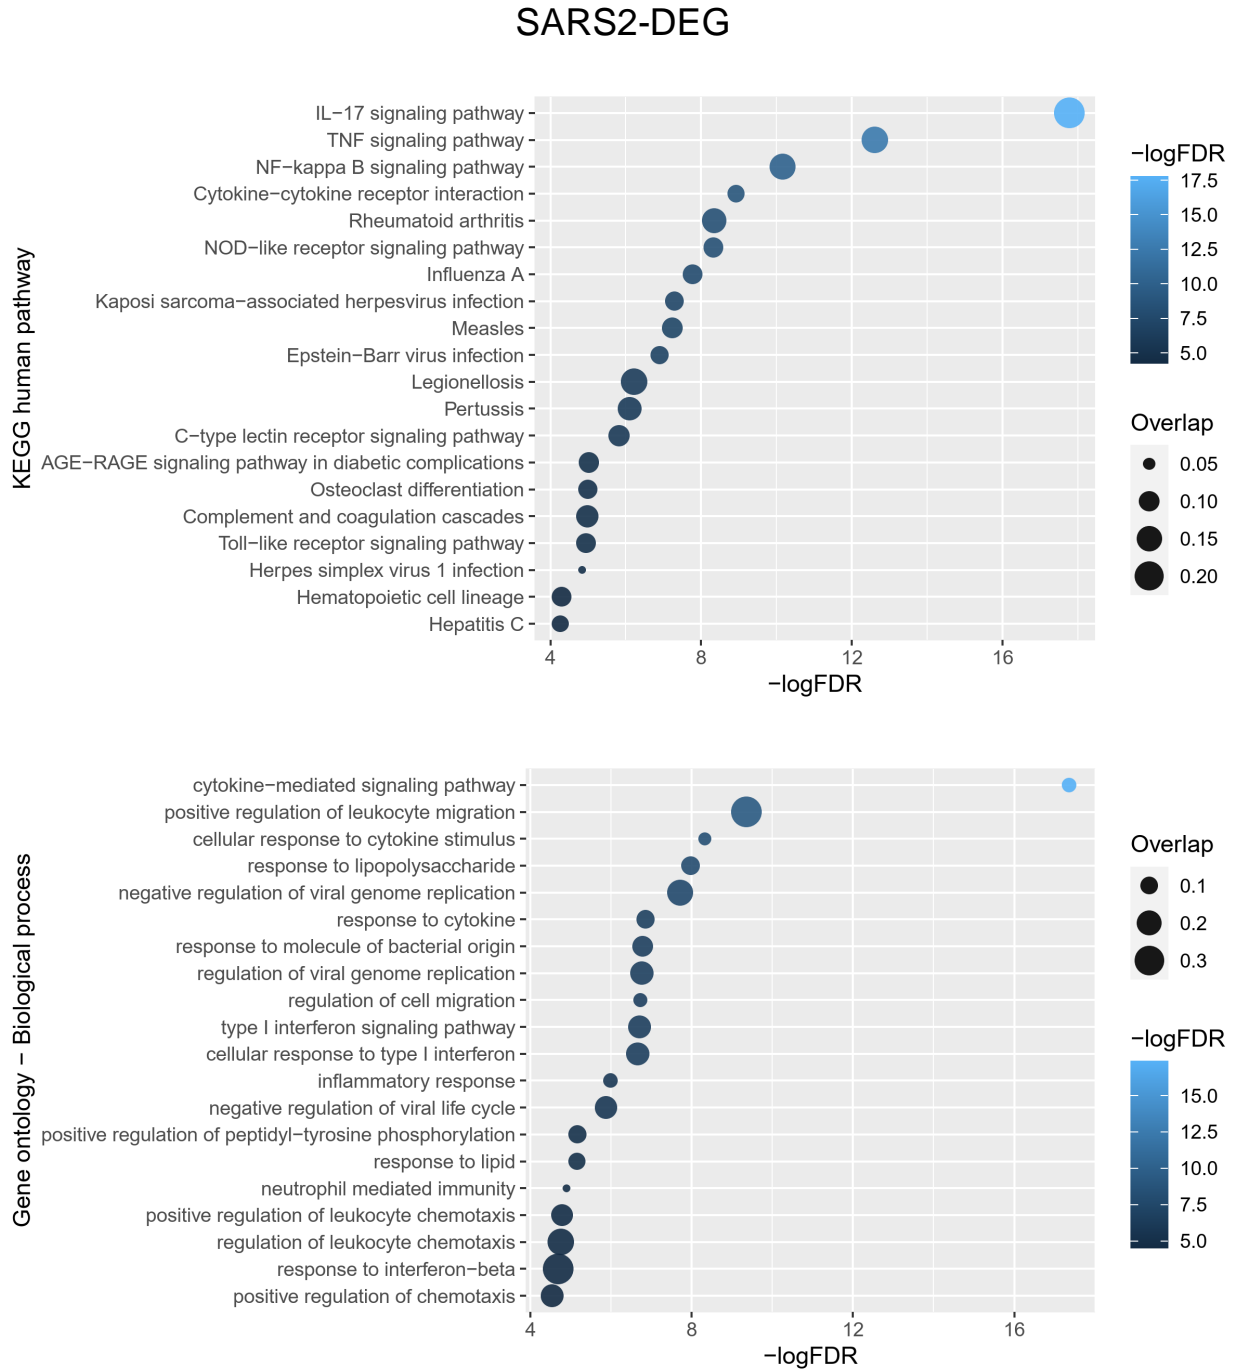

**S1 Fig. Functional enrichment analysis for SARS2-DEG.** In total, 246 differentially expressed genes (DEGs) in human bronchial epithelial cells infected with SARS-CoV-2 were obtained from the NCBI GEO database with the accession number GSE147507, denoted as SARS2-DEG. The data underlying this figure can be found in S7 Data.
