# Supplementary material for: A network medicine approach to investigation and population-based validation of disease manifestations and drug repurposing for COVID-19
Source: PubMed Central journal article supplement (PMC7728249; doi:10.1371/journal.pbio.3000970), 2020-11-06
Supplement: pbio.3000970.s013.pdf [file pbio.3000970.s013.pdf]

## S2 Fig

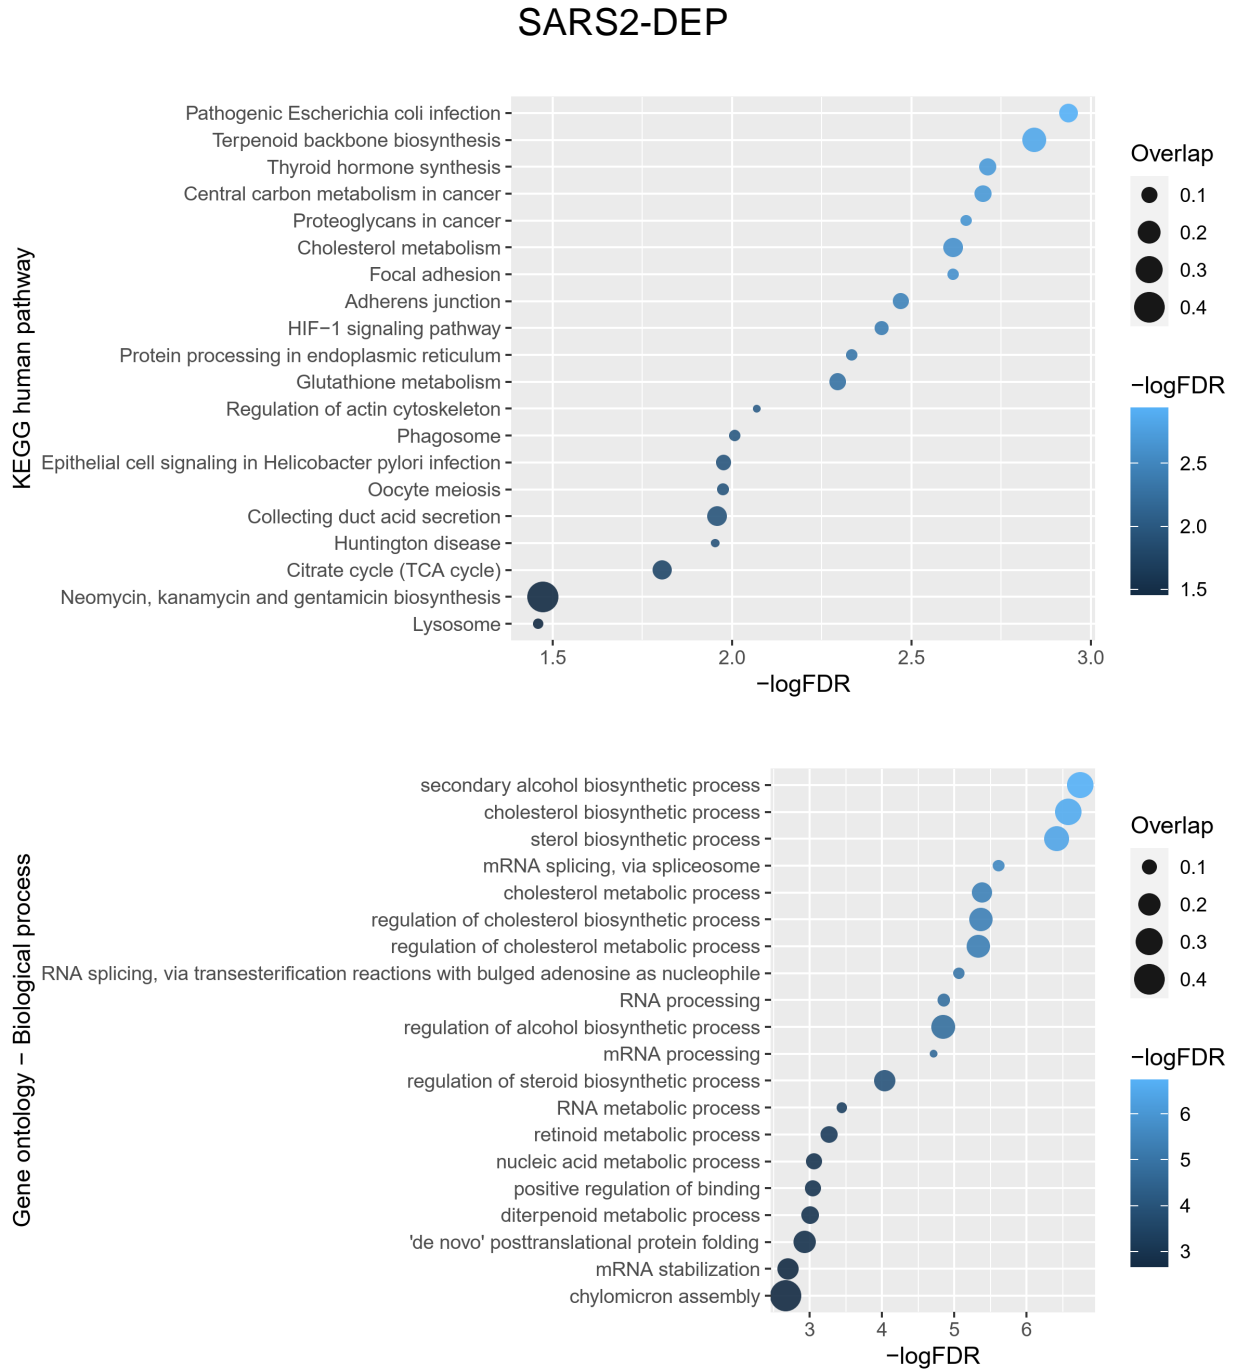

**S2 Fig. Functional enrichment analysis for SARS2-DEP.** In total, 293 differentially expressed proteins (DEPs) in human Caco-2 cells infected with SARS-CoV-2 were obtained from Bojkova, D. *et al.* [22], denoted as SARS2-DEP. The data underlying this figure can be found in S7 Data.
