# Supplementary material for: A network medicine approach to investigation and population-based validation of disease manifestations and drug repurposing for COVID-19
Source: PubMed Central journal article supplement (PMC7728249; doi:10.1371/journal.pbio.3000970), 2020-11-06
Supplement: pbio.3000970.s014.pdf [file pbio.3000970.s014.pdf]

S3 Fig

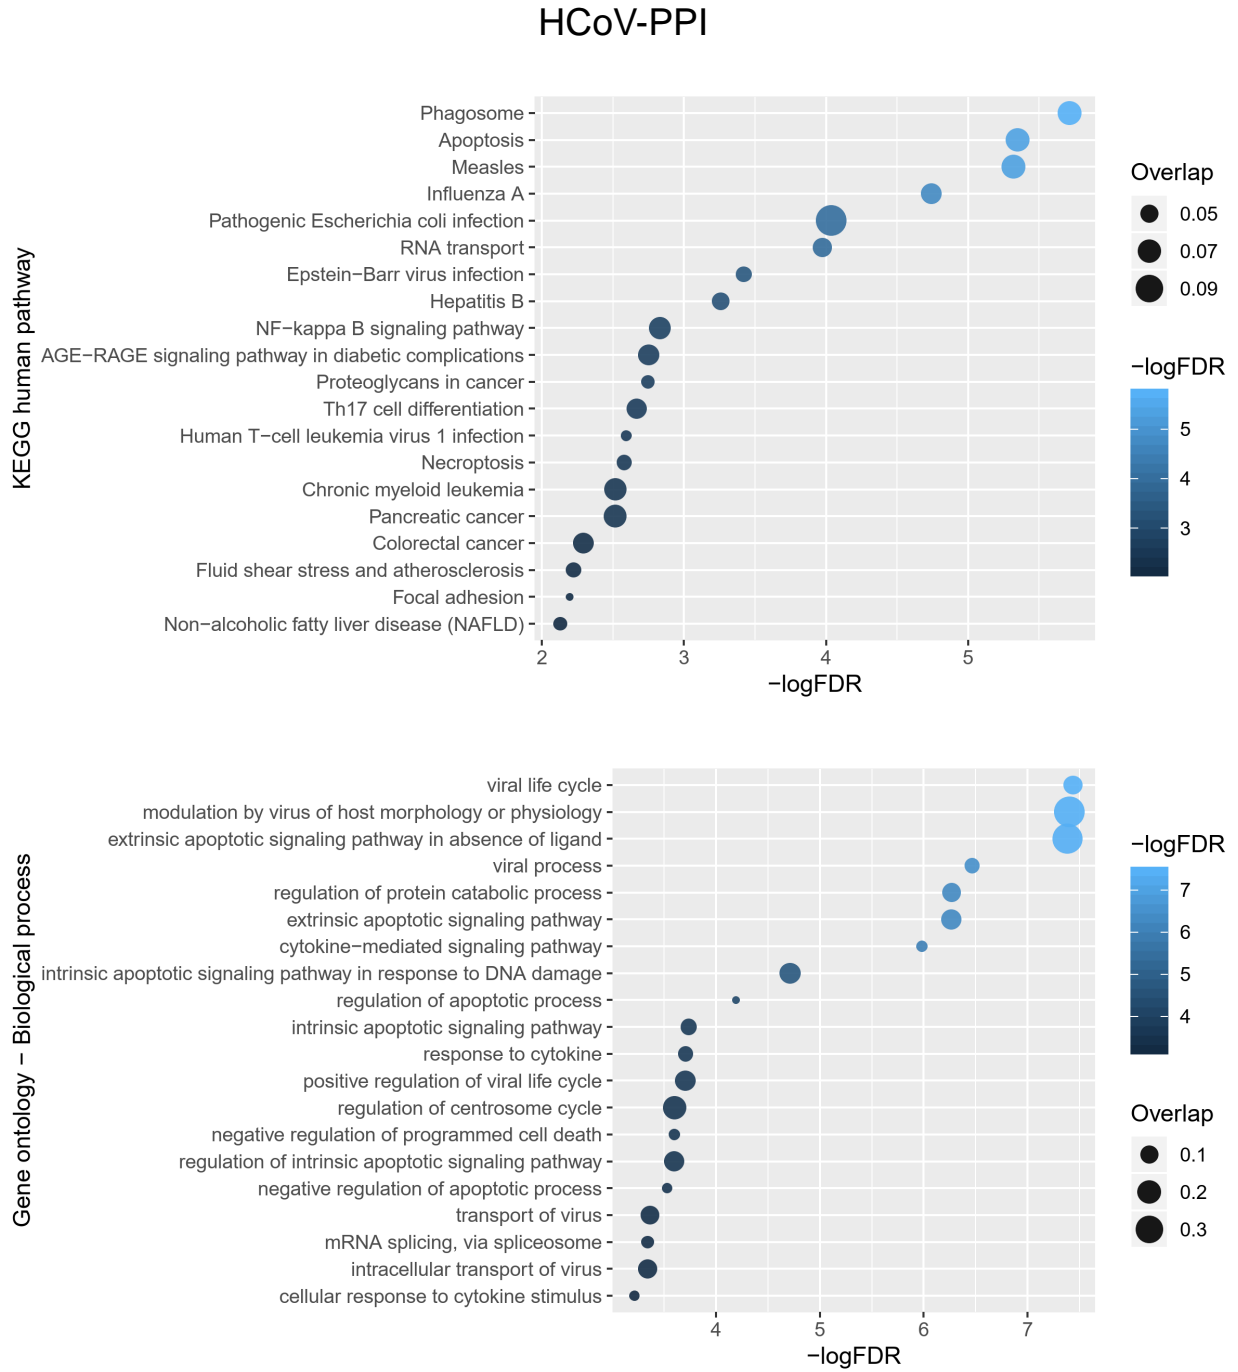

**S3 Fig. Functional enrichment analysis for HCoV-PPI.** This dataset contains 134 strong literature-evidence-based pan-human coronavirus target host proteins from Zhou, Y. *et al.* [30] with 15 newly curated proteins, denoted as HCoV-PPI. The data underlying this figure can be found in S7 Data.
