# Supplementary material for: A network medicine approach to investigation and population-based validation of disease manifestations and drug repurposing for COVID-19
Source: PubMed Central journal article supplement (PMC7728249; doi:10.1371/journal.pbio.3000970), 2020-11-06
Supplement: pbio.3000970.s015.pdf [file pbio.3000970.s015.pdf]

S4 Fig

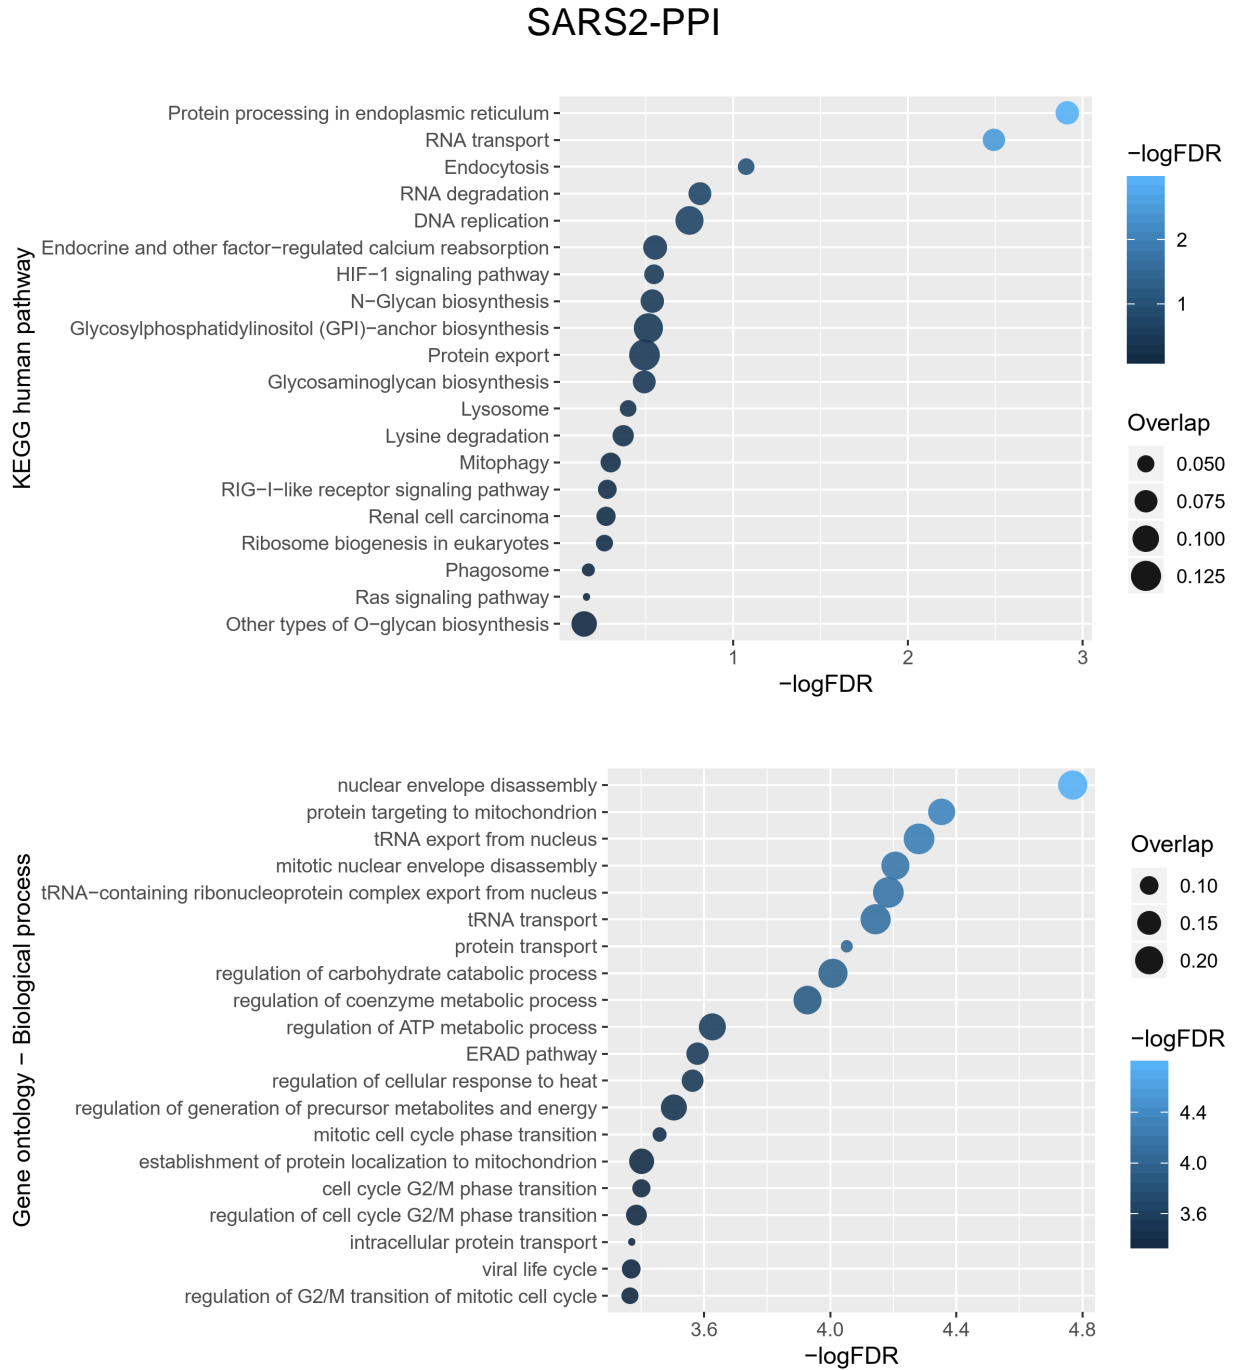

**S4 Fig. Functional enrichment analysis for SARS2-PPI.** This dataset contains 332 proteins involved in protein-protein interactions with 26 SARS-CoV-2 viral proteins identified by affinity purification-mass spectrometry from Gordon, D. E. *et al.* [8], denoted as SARS2-PPI. The data underlying this figure can be found in S7 Data.
