# Supplementary material for: A network medicine approach to investigation and population-based validation of disease manifestations and drug repurposing for COVID-19
Source: PubMed Central journal article supplement (PMC7728249; doi:10.1371/journal.pbio.3000970), 2020-11-06
Supplement: pbio.3000970.s017.pdf [file pbio.3000970.s017.pdf]

## S6 Fig

### SARS2-DEG

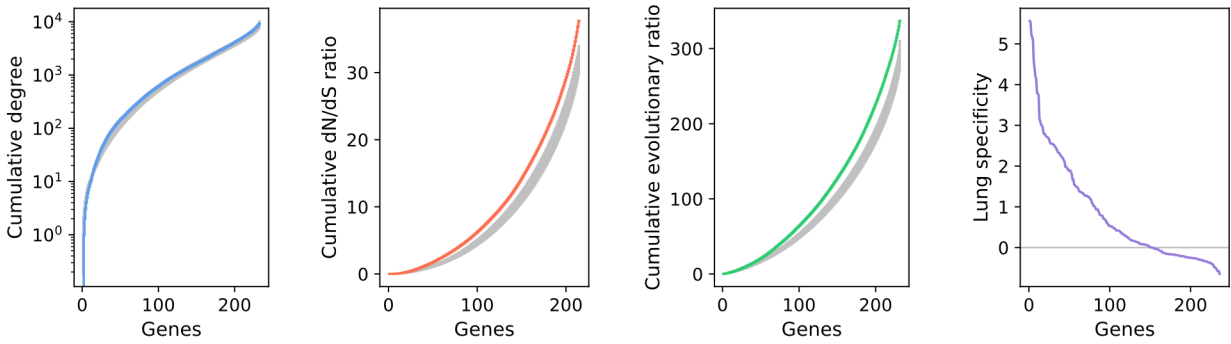

### SARS2-DEP

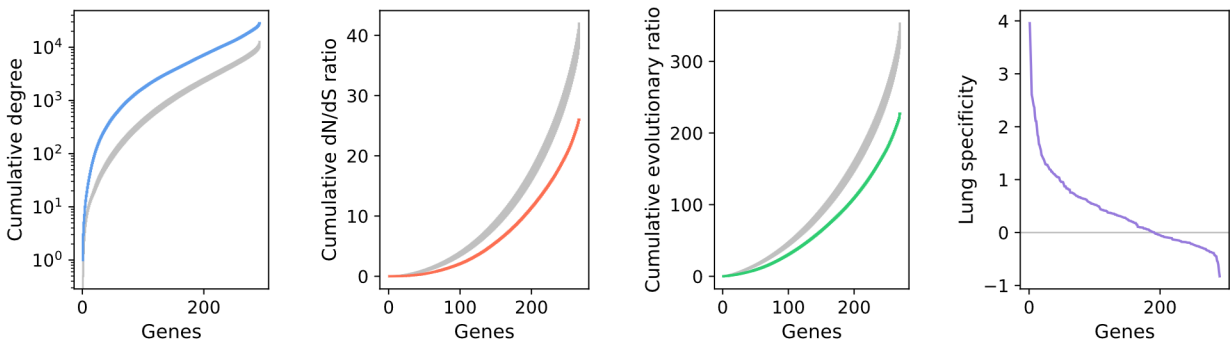

### HCoV-PPI

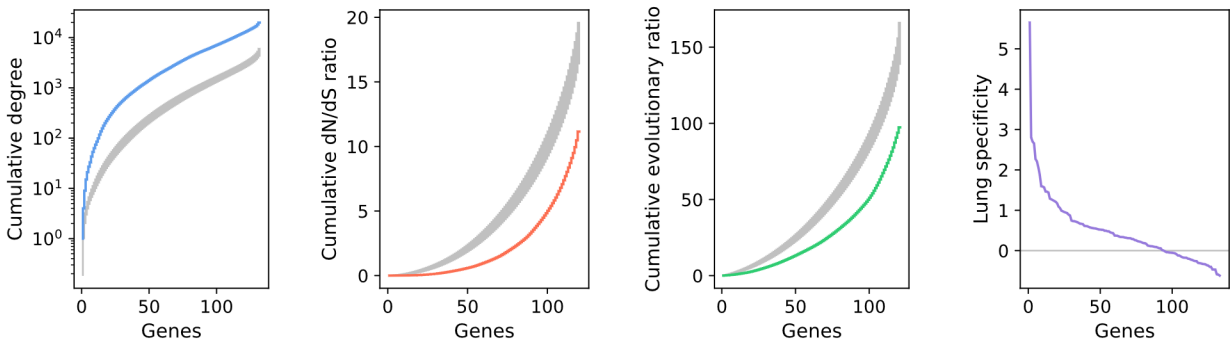

### SARS2-PPI

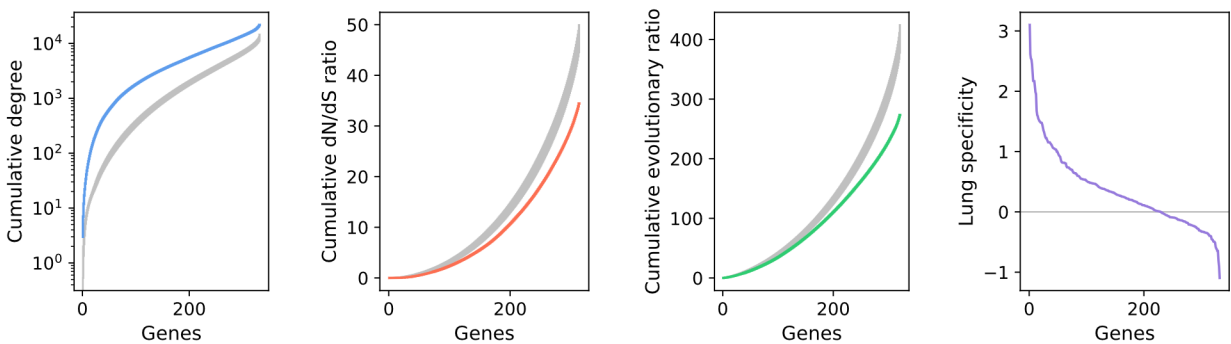

**S6 Fig. Characteristics of the four SARS-CoV-2 target datasets.** Node degree (blue),  $dN/dS$  ratio (orange), evolutionary ratio (green), and lung expression specificity (purple) are shown for each dataset. Grey areas indicate mean  $\pm$  standard deviation of 100 repeats using randomly selected genes. The data underlying this figure can be found in S8 Data.
