# Supplementary material for: A network medicine approach to investigation and population-based validation of disease manifestations and drug repurposing for COVID-19
Source: PubMed Central journal article supplement (PMC7728249; doi:10.1371/journal.pbio.3000970), 2020-11-06
Supplement: pbio.3000970.s018.pdf [file pbio.3000970.s018.pdf]

# S7 Fig

**A** ◆ COPD studies ◆ Pooled effects (Random model)

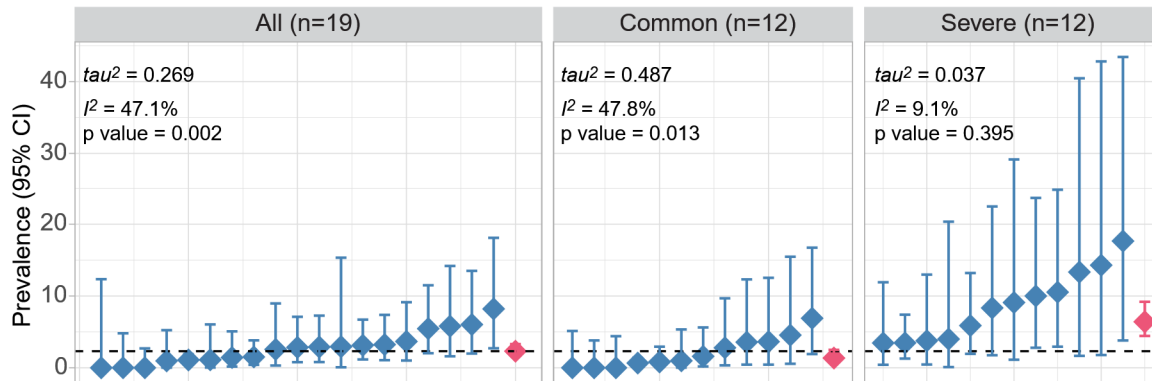

**B**

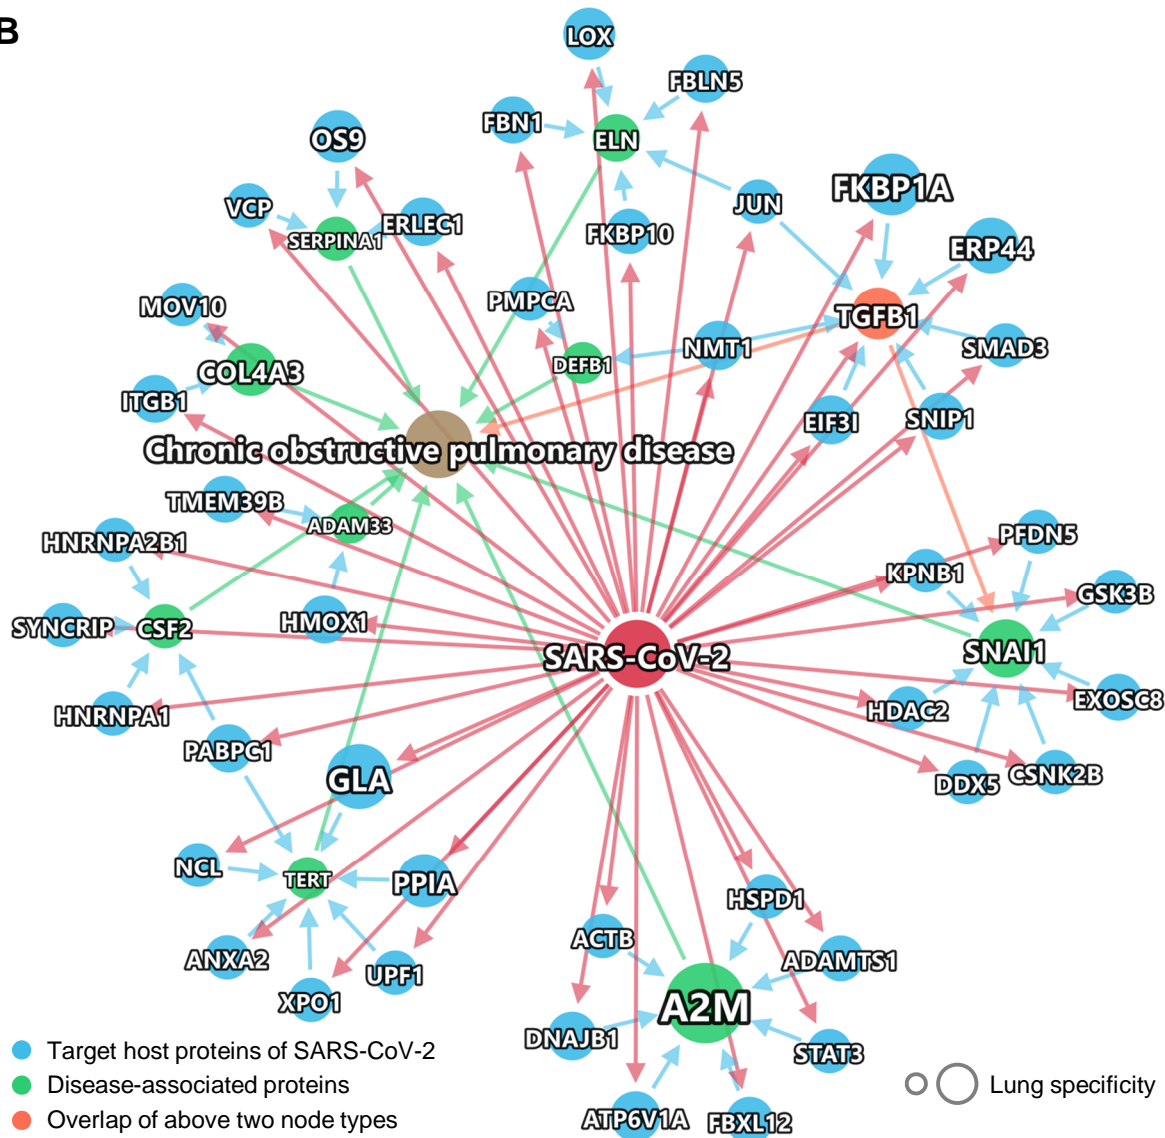

**S7 Fig. Chronic obstructive pulmonary disease and COVID-19. (A)** The risk of chronic obstructive pulmonary disease (COPD) is increased in severe COVID-19 patients. **(B)** Subnetwork shows the proteins potentially involved in the interaction between COPD and COVID-19. The data underlying this figure can be found in S9 Data.
