# Supplementary material for: A network medicine approach to investigation and population-based validation of disease manifestations and drug repurposing for COVID-19
Source: PubMed Central journal article supplement (PMC7728249; doi:10.1371/journal.pbio.3000970), 2020-11-06
Supplement: pbio.3000970.s019.pdf [file pbio.3000970.s019.pdf]

# S8 Fig

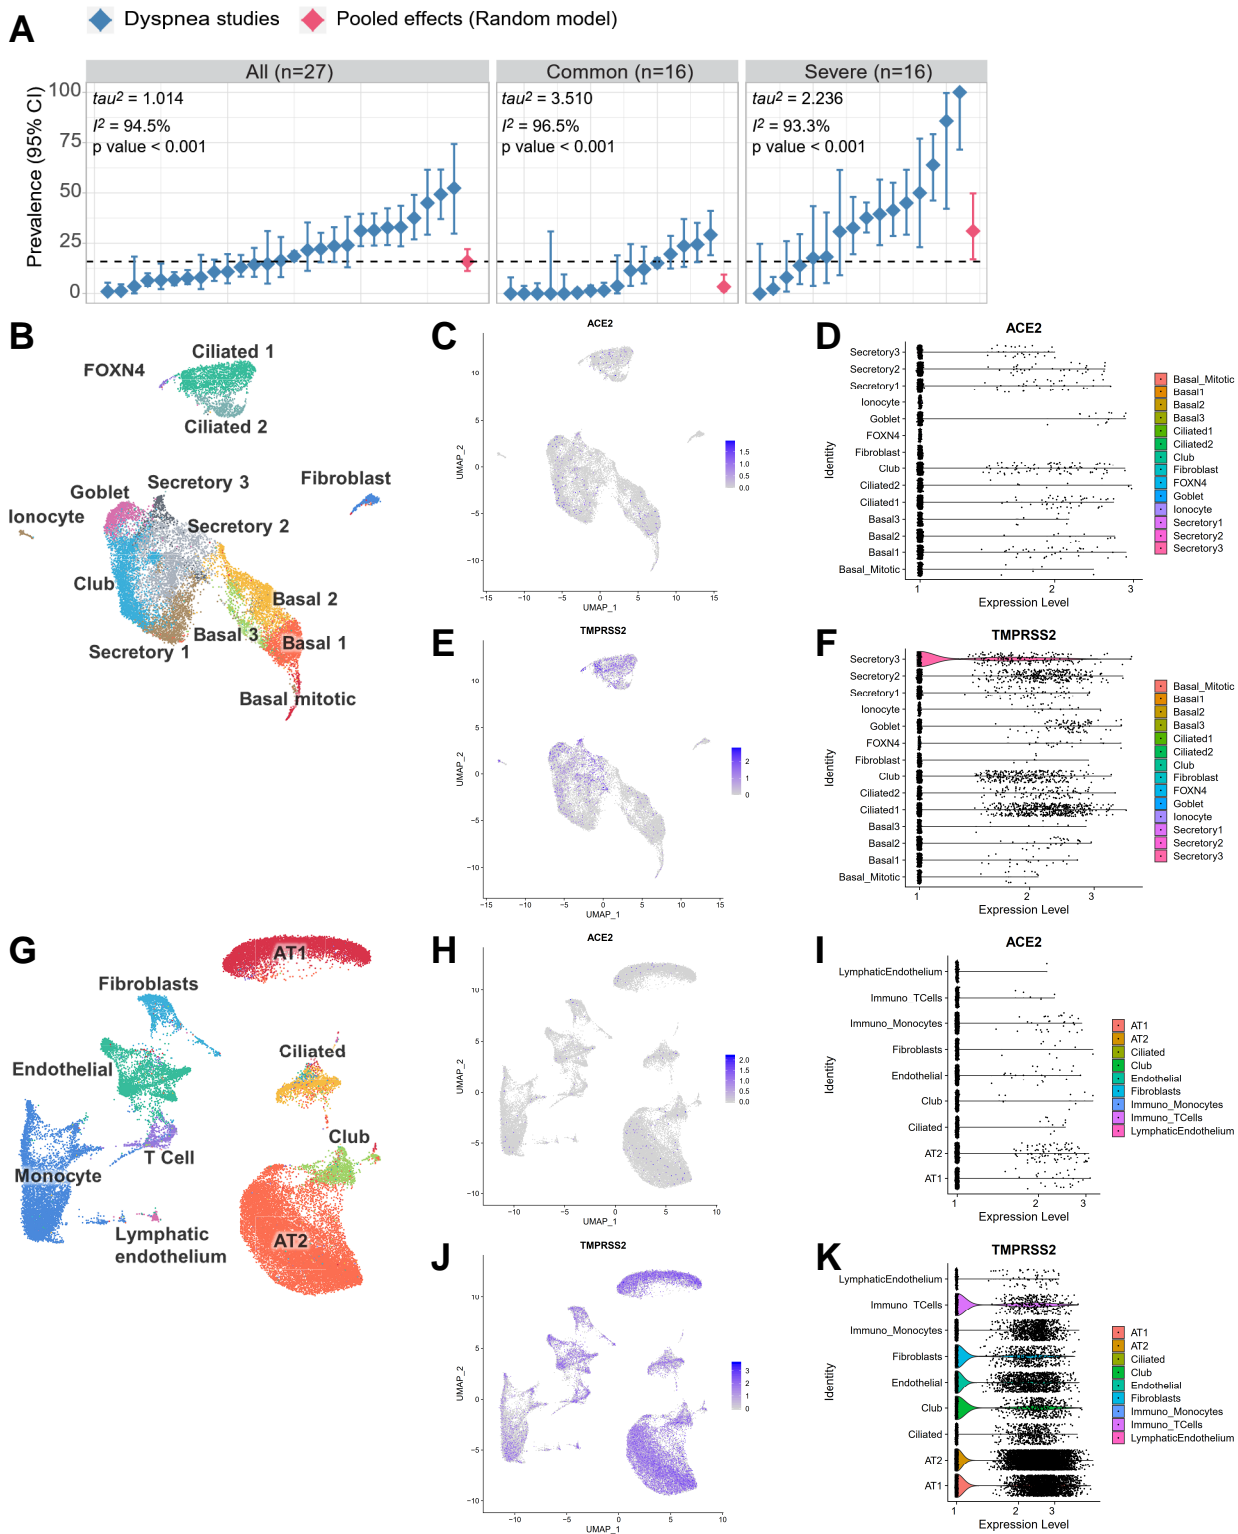

**S8 Fig. Asthma and COVID-19.** (A) The risk of dyspnea is increased in patients with severe COVID-19. (B) UMAP visualization for human bronchial epithelial cells. (C, D) Expression levels of *ACE2* across 14 cell types. (E, F) Expression levels of *TMPRSS2* across 14 cell types. (G) UMAP visualization for lung cells. (H, I) Expression levels of *ACE2* across 9 cell types. (J, K) Expression levels of *TMPRSS2* across 9 cell types. The single cell data with cell type annotation were retrieved from Lukassen, S. *et al.* [14], which contains 39,778 lung cells and 17,451 bronchial epithelial cells.
