# Supplementary material for: A network medicine approach to investigation and population-based validation of disease manifestations and drug repurposing for COVID-19
Source: PubMed Central journal article supplement (PMC7728249; doi:10.1371/journal.pbio.3000970), 2020-11-06
Supplement: pbio.3000970.s020.pdf [file pbio.3000970.s020.pdf]

# S9 Fig

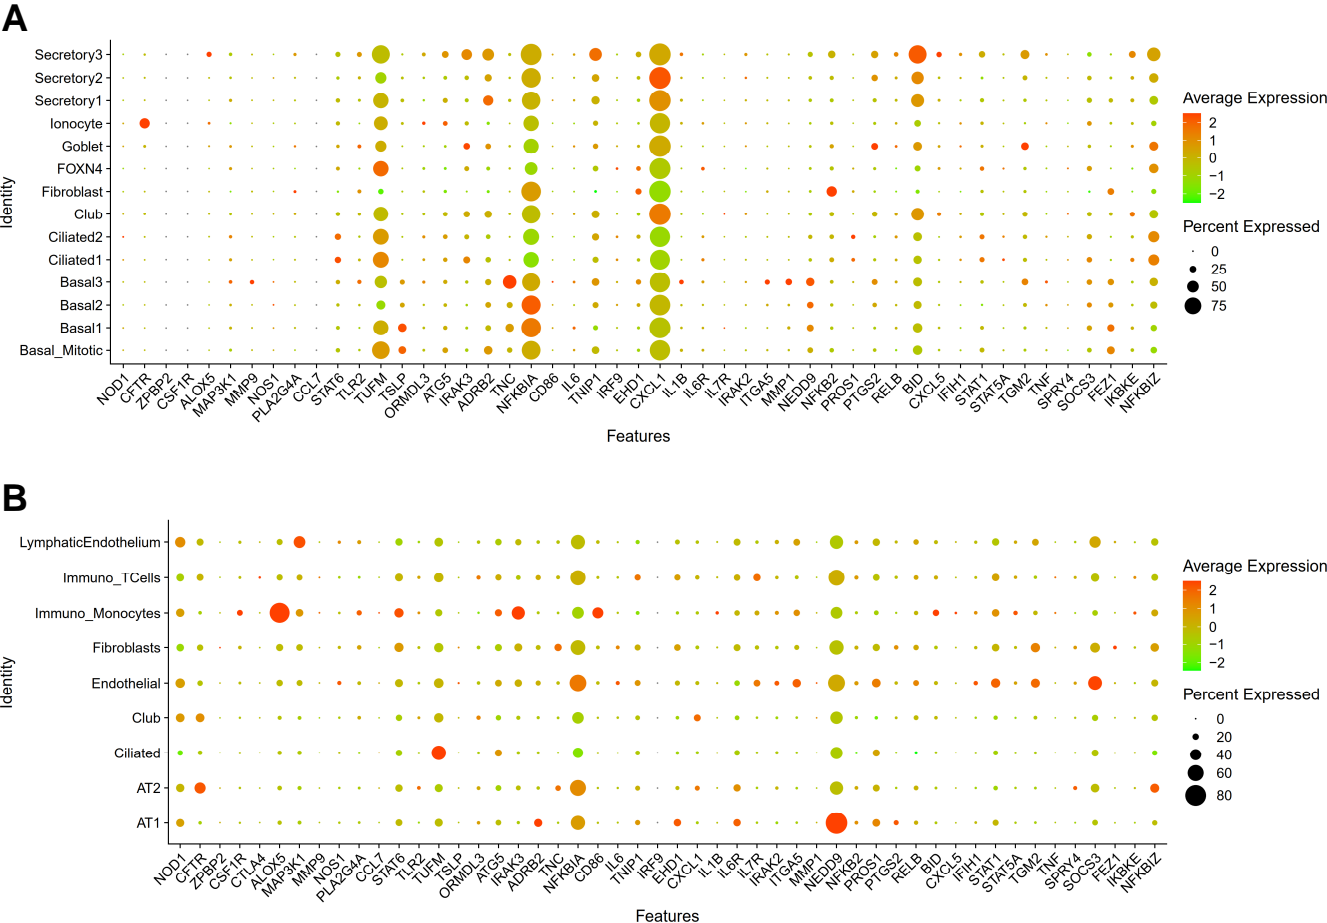

**S9 Fig. The expression of asthma genes and SARS-CoV-2 targets.** The expression levels of the genes from the asthma-COVID-19 subnetwork in bronchial epithelial cells (A) and lung cells (B) are shown.
