# Supplementary material for: A network medicine approach to investigation and population-based validation of disease manifestations and drug repurposing for COVID-19
Source: PubMed Central journal article supplement (PMC7728249; doi:10.1371/journal.pbio.3000970), 2020-11-06
Supplement: pbio.3000970.s021.pdf [file pbio.3000970.s021.pdf]

# S10 Fig

- A**
- ◆ Abdominal pain studies
  - ◆ Pooled effects (Random model)

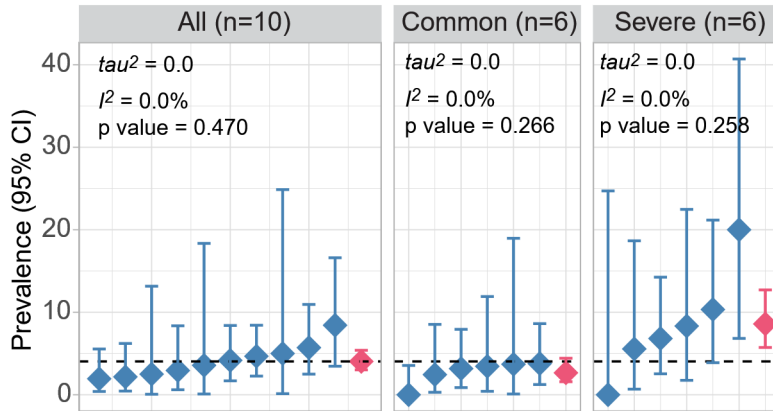

- B**
- ◆ Diarrhea studies
  - ◆ Pooled effects (Random model)

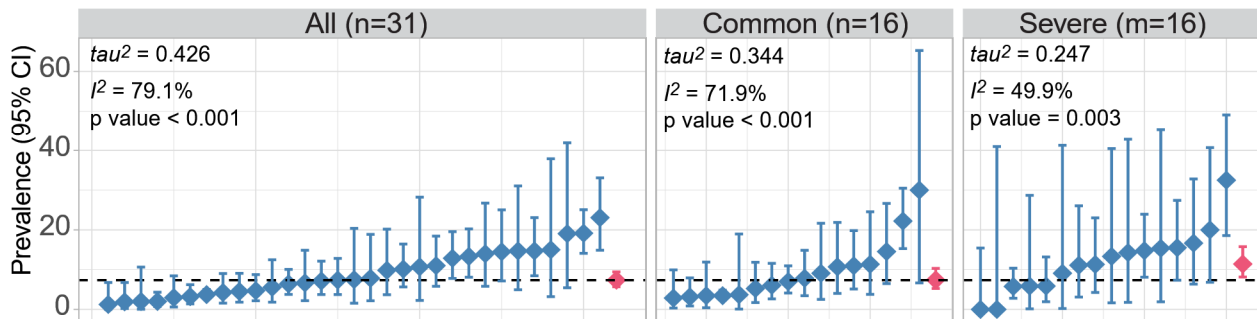

**S10 Fig. Risk ratios for abdominal pain and diarrhea in COVID-19 patients.** Abdominal pain (A) and diarrhea (B) have increased risks in patients with severe COVID-19.
