# Supplementary material for: A network medicine approach to investigation and population-based validation of disease manifestations and drug repurposing for COVID-19
Source: PubMed Central journal article supplement (PMC7728249; doi:10.1371/journal.pbio.3000970), 2020-11-06
Supplement: pbio.3000970.s022.pdf [file pbio.3000970.s022.pdf]

# S11 Fig

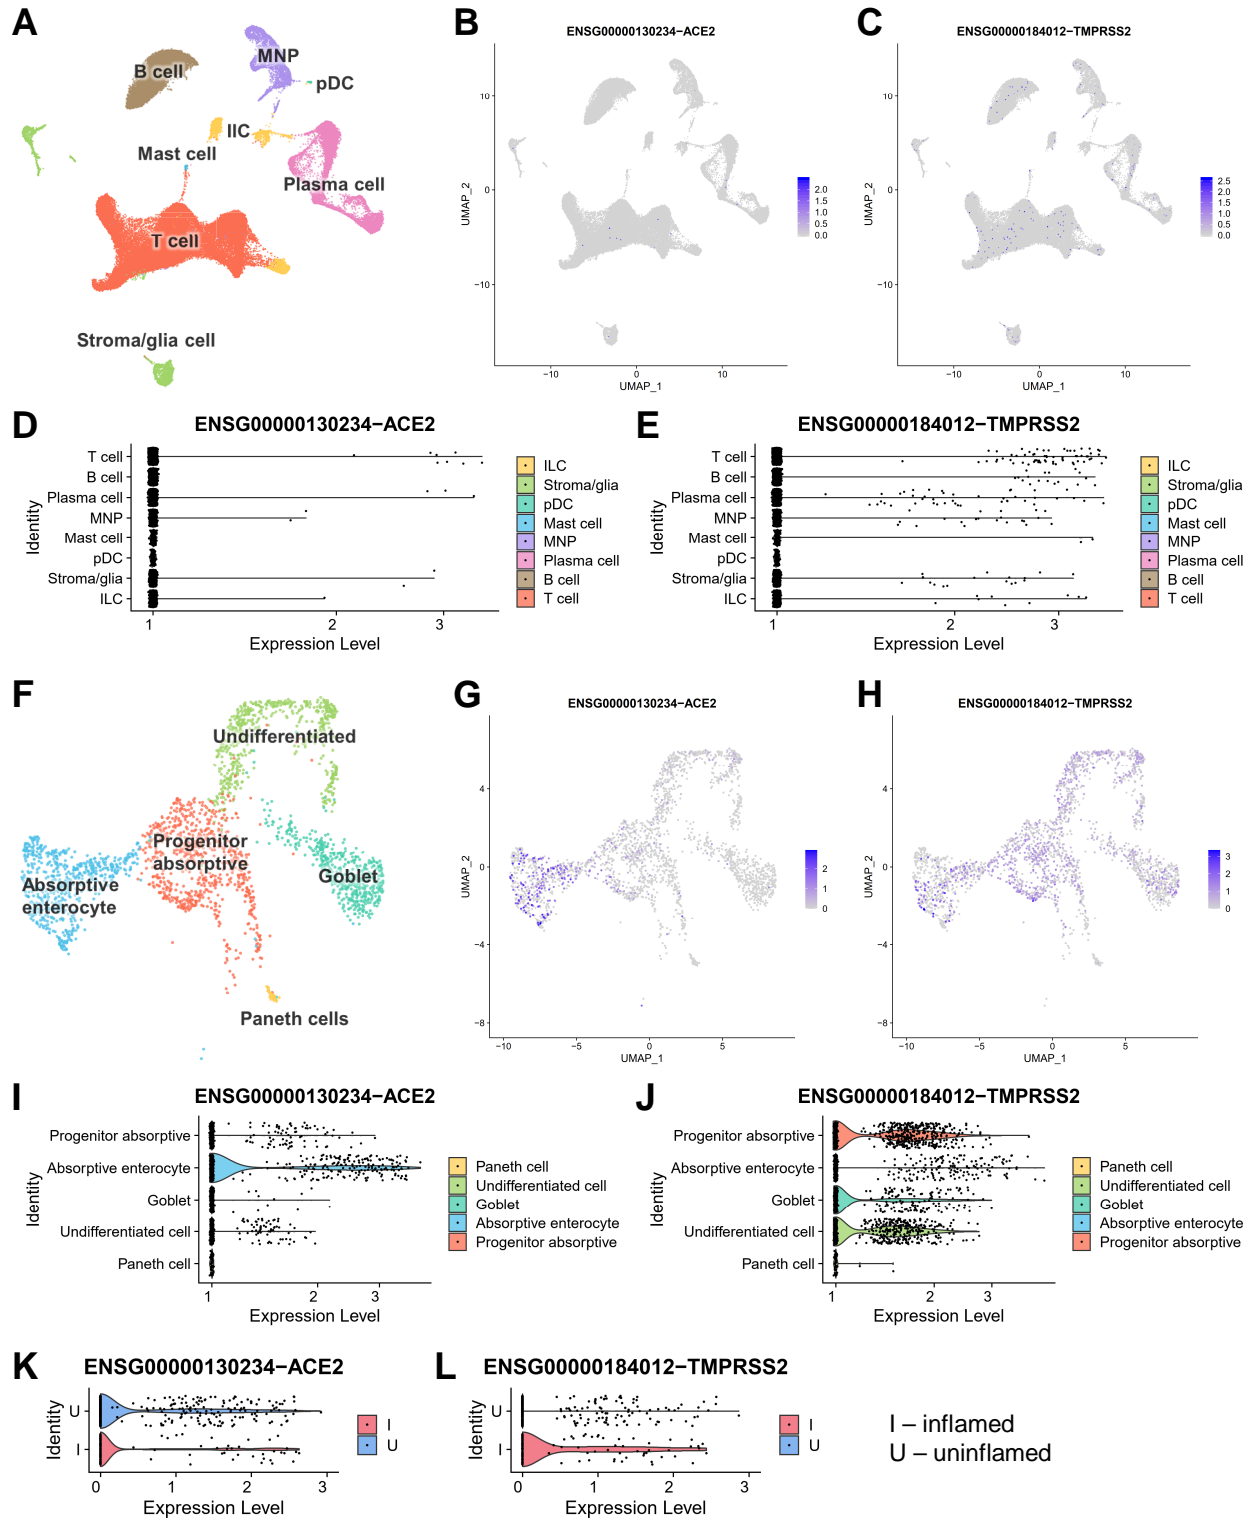

**S11 Fig. Inflammatory bowel disease and COVID-19.** (A) UMAP visualization of non-epithelial cells from the ileal tissues of patients with Crohn disease. (B, D) The expression of *ACE2* in the non-epithelial cells in A. (C, E) The expression of *TMPRSS2* in the non-epithelial cells in A. (F) UMAP visualization of epithelial cells from the ileal tissues of patients with Crohn disease. (G, I) The expression of *ACE2* in the epithelial cells in F. (H, J) The expression of *TMPRSS2* in the epithelial cells in F. (K, L) The expression levels of *ACE2* and *TMPRSS2* in inflamed versus uninfamed ileal absorptive enterocytes in Crohn disease patients. The single-cell data were retrieved from Martin, J. C. *et al.* [72], which contains 67,050 inflamed and uninfamed cells from the ileal samples of 8 patients with Crohn disease.
