# Supplementary material for: A network medicine approach to investigation and population-based validation of disease manifestations and drug repurposing for COVID-19
Source: PubMed Central journal article supplement (PMC7728249; doi:10.1371/journal.pbio.3000970), 2020-11-06
Supplement: pbio.3000970.s024.pdf [file pbio.3000970.s024.pdf]

# S13 Fig

## A. Black Americans

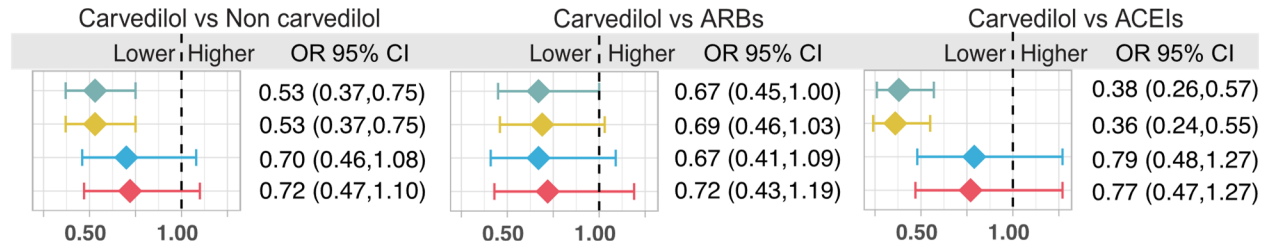

## B. White Americans

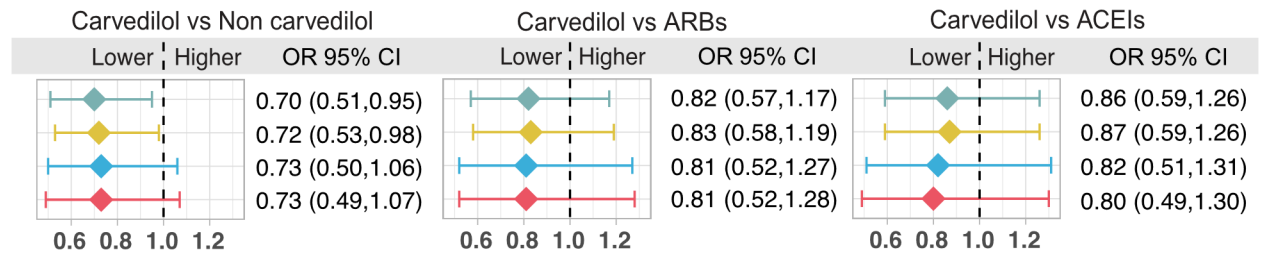

| Propensity score matching using                                                | Odds ratios of COVID-19 adjusted by                                          |
|--------------------------------------------------------------------------------|------------------------------------------------------------------------------|
| ◆ age, sex, smoking                                                            |                                                                              |
| ◆ age, sex, smoking                                                            | age, sex, smoking                                                            |
| ◆ age, sex, smoking, coronary artery disease, diabetes, hypertension, and COPD |                                                                              |
| ◆ age, sex, smoking, coronary artery disease, diabetes, hypertension, and COPD | age, sex, smoking, coronary artery disease, diabetes, hypertension, and COPD |

**S13 Fig. Comparison of the patient validation results of carvedilol use in black Americans and white Americans.** In black Americans, carvedilol use showed a lowered risk of a positive SARS-CoV-2 test when propensity score was matched with basic variables (age, sex, and smoking).
