# Supplementary material for: A network medicine approach to investigation and population-based validation of disease manifestations and drug repurposing for COVID-19
Source: PubMed Central journal article supplement (PMC7728249; doi:10.1371/journal.pbio.3000970), 2020-11-06
Supplement: pbio.3000970.s025.pdf [file pbio.3000970.s025.pdf]

**S14 Fig**

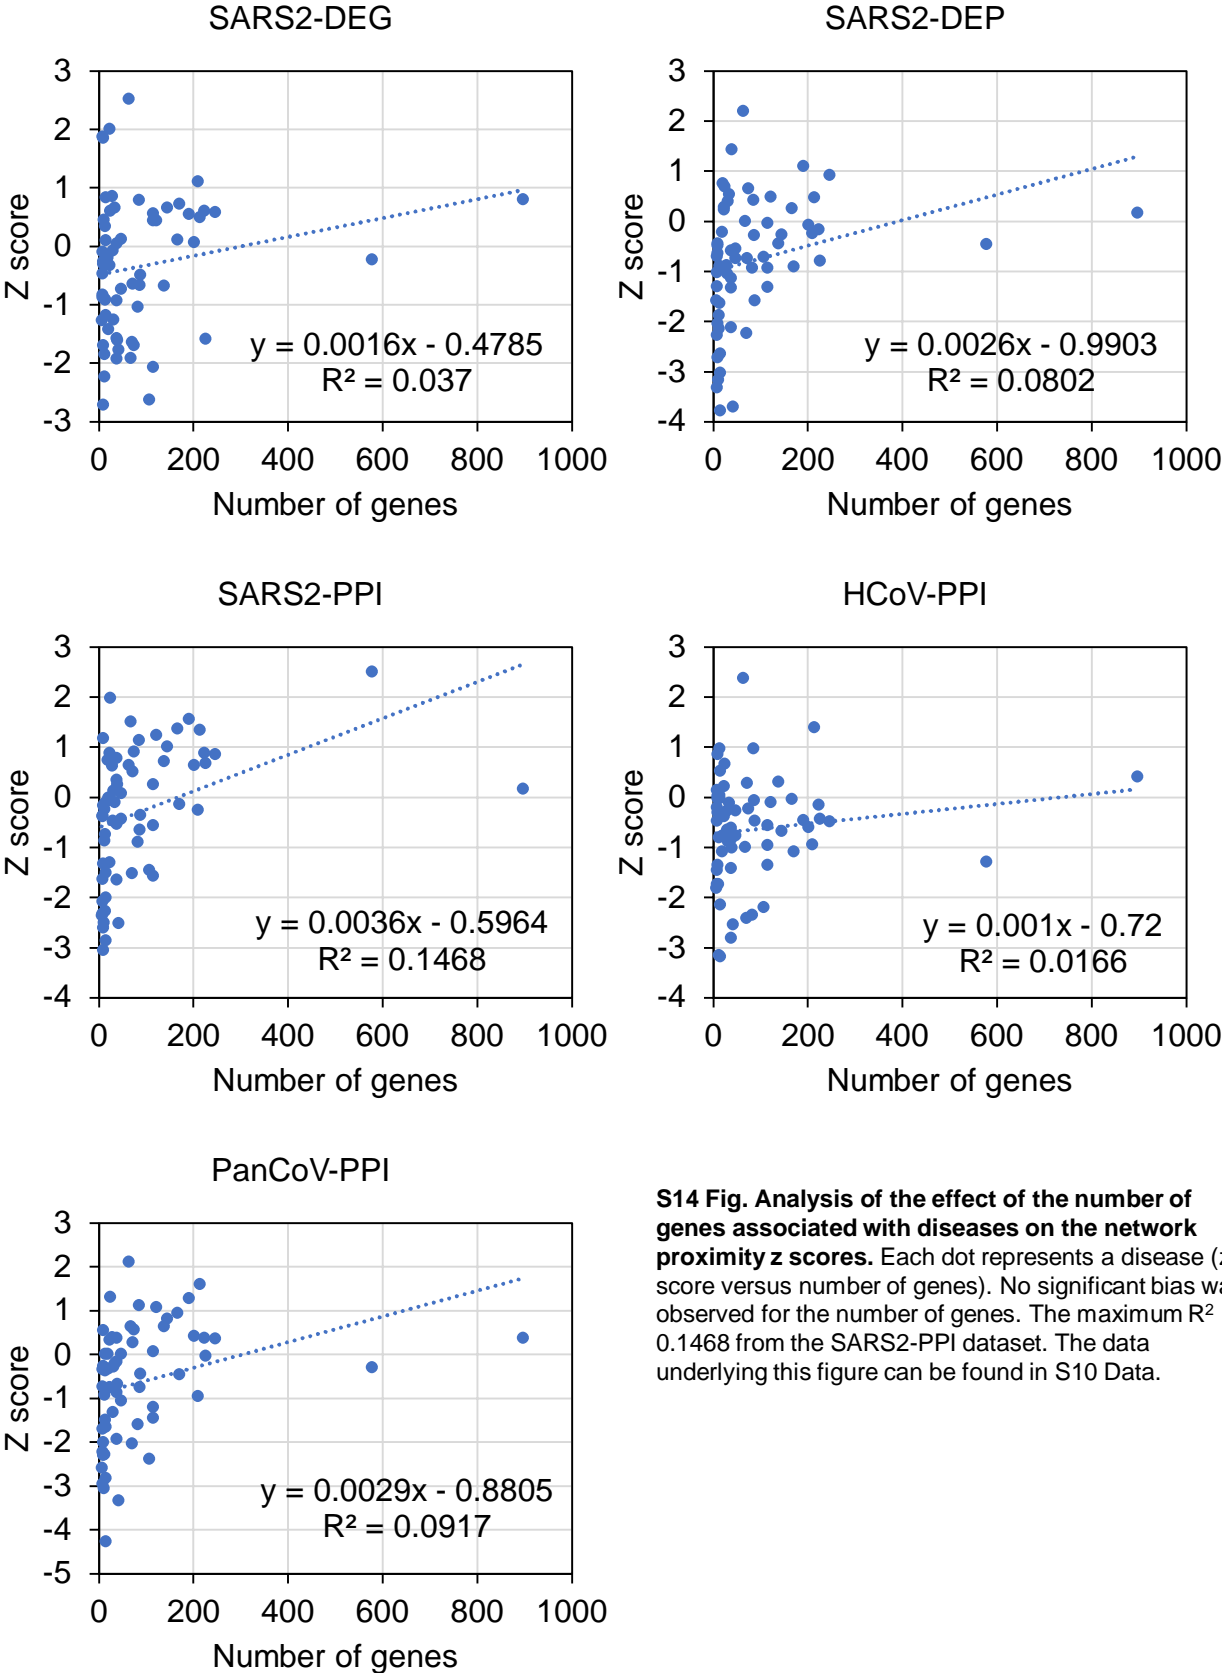

**S14 Fig. Analysis of the effect of the number of genes associated with diseases on the network proximity z scores.** Each dot represents a disease (z score versus number of genes). No significant bias was observed for the number of genes. The maximum  $R^2$  is 0.1468 from the SARS2-PPI dataset. The data underlying this figure can be found in S10 Data.
