# Supplementary material for: A network medicine approach to investigation and population-based validation of disease manifestations and drug repurposing for COVID-19
Source: PubMed Central journal article supplement (PMC7728249; doi:10.1371/journal.pbio.3000970), 2020-11-06
Supplement: pbio.3000970.s028.pdf [file pbio.3000970.s028.pdf]

**S17 Fig**

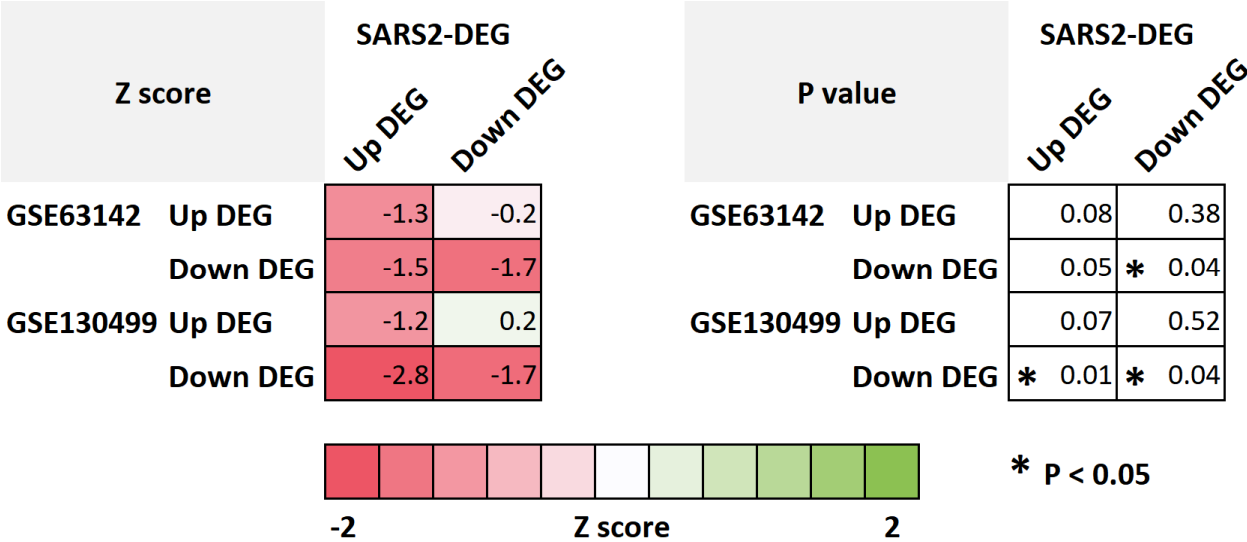

**S17 Fig. Network proximity analysis of asthma and COVID-19 taking into consideration the directionalities of the differential gene expression.** The up- and down- expressed genes in the two asthma datasets (GSE63142 and GSE130499, severe vs. control) were computed against the up- and down- expressed genes from the SARS2-DEG dataset. Overall, the results show more significant network proximities and smaller z scores than when the direction is not considered, as in Fig 4.
