# Supplementary material for: A network medicine approach to investigation and population-based validation of disease manifestations and drug repurposing for COVID-19
Source: PubMed Central journal article supplement (PMC7728249; doi:10.1371/journal.pbio.3000970), 2020-11-06
Supplement: pbio.3000970.s030.pdf [file pbio.3000970.s030.pdf]

## S19 Fig

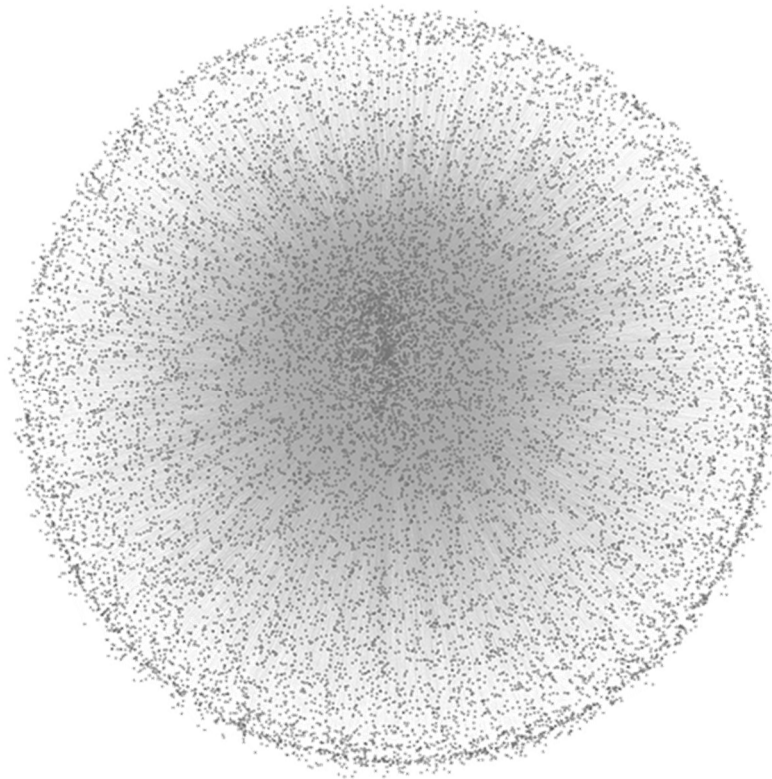

|                         |                 |
|-------------------------|-----------------|
| Number of nodes         | 17706           |
| Number of edges         | 351444          |
| Network density         | 0.002           |
| Degree (min-mean-max)   | 1 - 39.7 - 9777 |
| Distance (min-mean-max) | 1 - 2.70 - 8    |
| Clustering coefficient  | 0.158           |
| Network centralization  | 0.550           |
| Network density         | 0.002           |
| Network heterogeneity   | 2.775           |

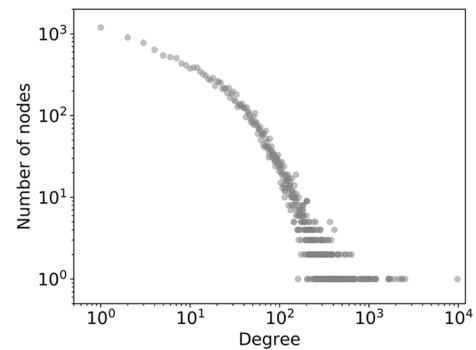

**S19 Fig. Overview of the human protein interactome.** Cytoscape 3.7.1 was used for the visualization and for generating the statistics. Clustering coefficient (ranges from 0 to 1) measures the extent to which the nodes in the network tend to cluster together. Network centralization (ranges from 0 to 1) measures the extent to which the topology resembles a star. Network density (ranges from 0 to 1) shows how densely the nodes are connected in the network. Network heterogeneity shows the tendency of the network to contain hub nodes.
