# Supplementary material for: A network medicine approach to investigation and population-based validation of disease manifestations and drug repurposing for COVID-19
Source: PubMed Central journal article supplement (PMC7728249; doi:10.1371/journal.pbio.3000970), 2020-11-06
Supplement: pbio.3000970.s032.pdf [file pbio.3000970.s032.pdf]

S21 Fig

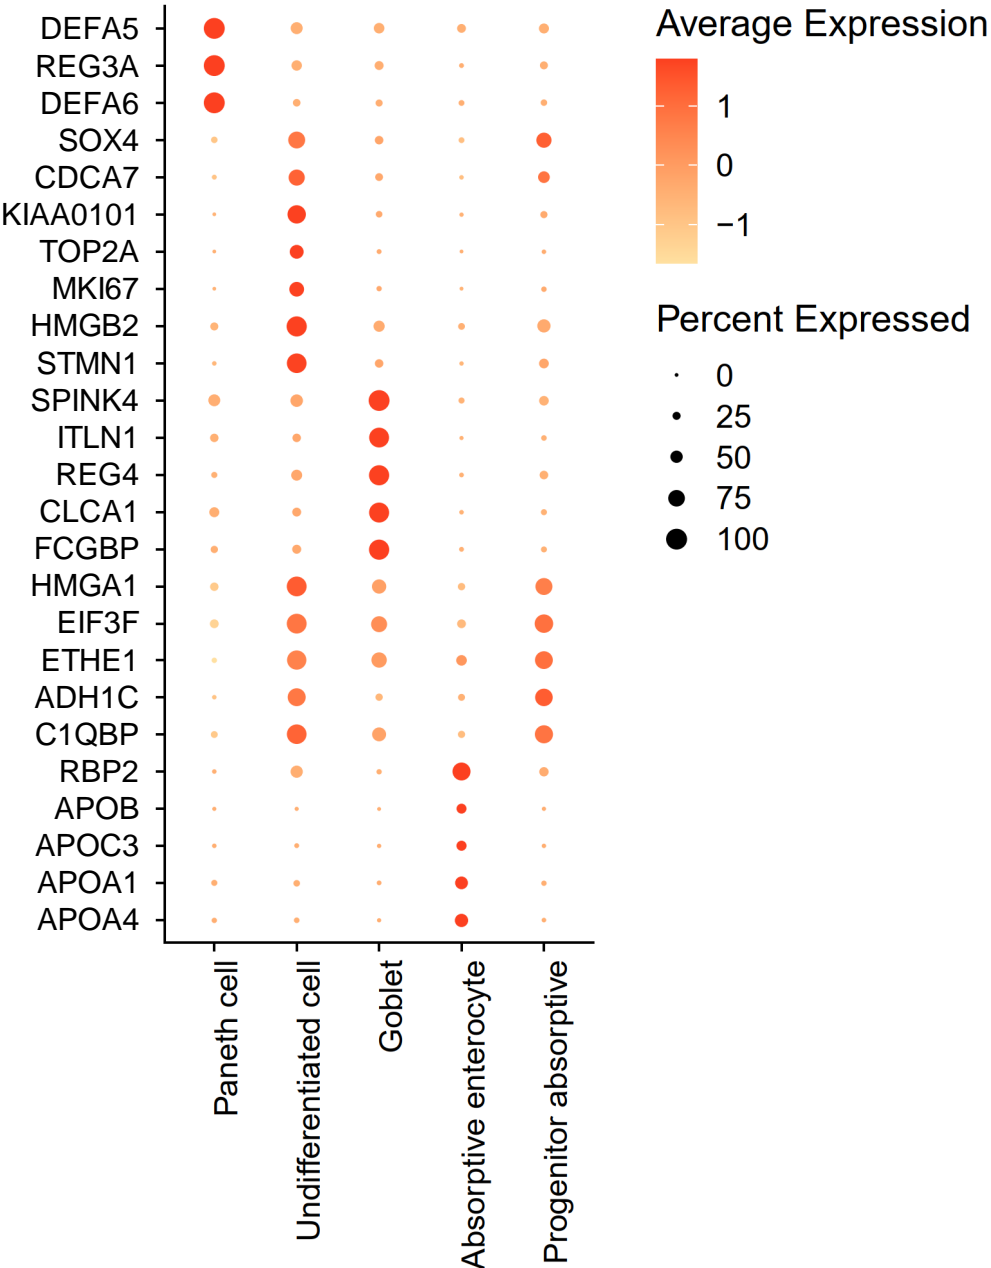

S21 Fig. Cell type markers and their expressions in dot plot used to identify the ileal epithelial cells.
