# Supplementary material for: A network medicine approach to investigation and population-based validation of disease manifestations and drug repurposing for COVID-19
Source: PubMed Central journal article supplement (PMC7728249; doi:10.1371/journal.pbio.3000970), 2020-11-06
Supplement: pbio.3000970.s034.pdf [file pbio.3000970.s034.pdf]

**S1 Table. Summary of the data sets used in this study.**

| Data set                                                                 | Description                                                                                                                                                                                                                  | PubMed ID and/or GEO      |
|--------------------------------------------------------------------------|------------------------------------------------------------------------------------------------------------------------------------------------------------------------------------------------------------------------------|---------------------------|
| Blanco-Melo D <i>et al.</i> ,<br><i>Cell</i> . 2020                      | Alias: SARS2-DEG<br>Purpose: Drug screen and comorbidity identification, GSEA<br>Groups: Human bronchial epithelial cells infected with SARS-CoV-2 (3 replicates) vs. uninfected (3 replicates)                              | 32416070<br>GSE147507     |
| Bojkova D <i>et al.</i> ,<br><i>Nature</i> . 2020                        | Alias: SARS2-DEP<br>Purpose: Drug screen and comorbidity identification, GSEA<br>Groups: Human Caco-2 cells infected with SARS-CoV-2 vs. uninfected                                                                          | 32408336                  |
| Zhou Y <i>et al.</i> ,<br><i>Cell Discov</i> . 2020                      | Alias: HCoV-PPI<br>Purpose: Drug screen and comorbidity identification<br>134 strong literature evidence-based pan-human coronavirus target host proteins including 15 newly added proteins                                  | 32194980                  |
| Gordon DE <i>et al.</i> ,<br><i>Nature</i> . 2020.                       | Alias: SARS2-PPI<br>Purpose: Drug screen and comorbidity identification<br>332 proteins involved in the protein-protein interactions with 26 SARS-CoV-2 viral proteins identified by affinity purification-mass spectrometry | 32353859                  |
| Modena BD <i>et al.</i> ,<br><i>Am J Respir Crit Care Med</i> . 2014     | Purpose: To provide DEGs in asthma patients<br>bronchial epithelial cells of 27 control samples, 72 mild asthma samples, and 56 severe asthma samples were obtained by bronchoscopy with endobronchial epithelial brushing   | 25338189<br>GSE63142      |
| Weathington N <i>et al.</i> ,<br><i>Am J Respir Crit Care Med</i> . 2019 | Purpose: To provide DEGs in asthma patients<br>bronchial epithelial cells of 38 control samples, 72 mild asthma samples, and 44 severe asthma samples were available by bronchoscopy with endobronchial epithelial brushing  | 31161938<br>GSE130499     |
| Lukassen S <i>et al.</i> ,<br><i>EMBO J</i> . 2020                       | Purpose: Single-cell study for understanding the association between COVID-19 and asthma<br>This data set contains single-cell data of normal lung and primary human bronchial epithelial cells                              | 32246845                  |
| Martin JC <i>et al.</i> ,<br><i>Cell</i> . 2019                          | Purpose: Single-cell study for understanding the association between COVID-19 and IBD<br>This data set contains both inflamed and uninfamed cells from the ileal samples of 8 patients with Crohn's disease                  | 31474370<br>GSE134809     |
| Yuan S <i>et al.</i> ,<br><i>Nat Commun</i> . 2019                       | Alias: MERS<br>Purpose: To provide DEGs for GSEA<br>Groups: MERS-CoV infected Calu-3 cells (3 replicates) vs. uninfected (3 replicates)                                                                                      | 30631056<br>GSE12287<br>6 |
| Sims AC <i>et al.</i> ,<br><i>J Virol</i> . 2013                         | Alias: SARSa<br>Purpose: To provide DEGs for GSEA<br>Groups: SARS-CoV-1 infected Calu-3 cells (3 replicates) vs. uninfected (3 replicates)                                                                                   | 23365422<br>GSE33267      |
| Reghunathan R <i>et al.</i> ,<br><i>BMC Immunol</i> . 2005               | Alias: SARSa<br>Purpose: To provide DEGs for GSEA<br>Groups: SARS-CoV-1 infected patients' peripheral blood (10 samples) vs. normal blood samples (4 samples)                                                                | 15655079<br>GSE1739       |

GSEA, Gene set enrichment analysis. DEG, differentially expressed gene. DEP, differentially expressed protein. PPI, protein-protein interaction. IBD, inflammatory bowel disease.
